# Supplementary material for: Clinical significance, tumor immune landscape and immunotherapy responses of ADAR in pan-cancer and its association with proliferation and metastasis of bladder cancer
Source: publisher site journal article supplement (doi:10.18632/aging.204853), 2023-07-06
Supplement: Supplementary file [file aging-v15i13-204853-supplementary-material-SD2.pdf]

## SUPPLEMENTARY TABLES

**Supplementary Table 1. List of the top 100 ADAR-related genes from GEPIA2.0.**

| Gene symbol | Gene ID            | PCC  |
|-------------|--------------------|------|
| ISG20L2     | ENSG00000143319.16 | 0.75 |
| YY1AP1      | ENSG00000163374.19 | 0.74 |
| SMG7        | ENSG00000116698.20 | 0.72 |
| EIF2AK2     | ENSG00000055332.16 | 0.7  |
| UBAP2L      | ENSG00000143569.18 | 0.7  |
| ATF6        | ENSG00000118217.5  | 0.7  |
| PIP5K1A     | ENSG00000143398.19 | 0.7  |
| CEP350      | ENSG00000135837.15 | 0.69 |
| UHMK1       | ENSG00000152332.15 | 0.68 |
| RAB3GAP2    | ENSG00000118873.15 | 0.68 |
| TAF5L       | ENSG00000135801.9  | 0.67 |
| COPA        | ENSG00000122218.14 | 0.67 |
| RPRD2       | ENSG00000163125.15 | 0.67 |
| GATAD2B     | ENSG00000143614.7  | 0.67 |
| RBM12       | ENSG00000244462.7  | 0.67 |
| WDR26       | ENSG00000162923.14 | 0.67 |
| ADNP        | ENSG00000101126.15 | 0.67 |
| TROVE2      | ENSG00000116747.12 | 0.67 |
| EXOC8       | ENSG00000116903.7  | 0.67 |
| HNRNPU      | ENSG00000153187.16 | 0.66 |
| AHCTF1      | ENSG00000153207.14 | 0.66 |
| UBE2Q1      | ENSG00000160714.9  | 0.66 |
| DIEXF       | ENSG00000117597.17 | 0.66 |
| ARNT        | ENSG00000143437.20 | 0.66 |
| SPRTN       | ENSG00000010072.15 | 0.66 |
| RBM12B      | ENSG00000183808.11 | 0.65 |
| ACBD3       | ENSG00000182827.8  | 0.65 |
| ARID4B      | ENSG00000054267.20 | 0.65 |
| RBBP5       | ENSG00000117222.13 | 0.65 |
| TRIP12      | ENSG00000153827.13 | 0.65 |
| PRRC2C      | ENSG00000117523.15 | 0.65 |
| BLZF1       | ENSG00000117475.13 | 0.64 |
| ASH1L       | ENSG00000116539.10 | 0.64 |
| SDE2        | ENSG00000143751.9  | 0.64 |
| POLR3C      | ENSG00000186141.8  | 0.64 |
| SP3         | ENSG00000172845.13 | 0.64 |
| TPM3        | ENSG00000143549.19 | 0.64 |
| URB2        | ENSG00000135763.9  | 0.64 |
| SCYL3       | ENSG00000000457.13 | 0.64 |
| HEATR1      | ENSG00000119285.10 | 0.64 |
| GOSR1       | ENSG00000108587.14 | 0.63 |
| POGK        | ENSG00000143157.11 | 0.63 |
| ETV3        | ENSG00000117036.11 | 0.63 |
| DTX3L       | ENSG00000163840.9  | 0.63 |
| USP37       | ENSG00000135913.10 | 0.63 |
| DEDD        | ENSG00000158796.16 | 0.63 |
| BROX        | ENSG00000162819.11 | 0.63 |
| BCLAF1      | ENSG00000029363.15 | 0.63 |
| THRAP3      | ENSG00000054118.13 | 0.63 |
| TRMT1L      | ENSG00000121486.11 | 0.63 |
| ANGEL2      | ENSG00000174606.12 | 0.63 |
| DDX46       | ENSG00000145833.15 | 0.62 |

|          |                    |      |
|----------|--------------------|------|
| ZNFX1    | ENSG00000124201.14 | 0.62 |
| UHRF1BP1 | ENSG00000065060.16 | 0.62 |
| NSD1     | ENSG00000165671.18 | 0.62 |
| PRUNE    | ENSG00000143363.15 | 0.62 |
| TSNAX    | ENSG00000116918.13 | 0.62 |
| SNX27    | ENSG00000143376.12 | 0.62 |
| ZNF669   | ENSG00000188295.14 | 0.62 |
| ZMYM4    | ENSG00000146463.11 | 0.62 |
| ZNF281   | ENSG00000162702.7  | 0.62 |
| OTUD7B   | ENSG00000264522.5  | 0.62 |
| ZNF623   | ENSG00000183309.11 | 0.62 |
| NUP153   | ENSG00000124789.11 | 0.62 |
| FAM20B   | ENSG00000116199.11 | 0.62 |
| HNRNPK   | ENSG00000165119.18 | 0.61 |
| UBN1     | ENSG00000118900.14 | 0.61 |
| GTF3C4   | ENSG00000125484.11 | 0.61 |
| CNOT6    | ENSG00000113300.11 | 0.61 |
| RBM27    | ENSG00000091009.7  | 0.61 |
| ZSCAN29  | ENSG00000140265.12 | 0.61 |
| METTL14  | ENSG00000145388.14 | 0.61 |
| SENP1    | ENSG00000079387.13 | 0.61 |
| CELF1    | ENSG00000149187.17 | 0.61 |
| RFX5     | ENSG00000143390.17 | 0.61 |
| IARS2    | ENSG00000067704.9  | 0.61 |
| GPR89A   | ENSG00000117262.18 | 0.61 |
| CREB1    | ENSG00000118260.14 | 0.61 |
| WAC      | ENSG00000095787.21 | 0.61 |
| CACUL1   | ENSG00000151893.14 | 0.61 |
| SLC25A44 | ENSG00000160785.13 | 0.6  |
| PUM2     | ENSG00000055917.15 | 0.6  |
| CDC73    | ENSG00000134371.9  | 0.6  |
| POGZ     | ENSG00000143442.21 | 0.6  |
| ZBTB41   | ENSG00000177888.7  | 0.6  |
| PYGO2    | ENSG00000163348.3  | 0.6  |
| NUP133   | ENSG00000069248.11 | 0.6  |
| UBQLN4   | ENSG00000160803.7  | 0.6  |
| STX17    | ENSG00000136874.10 | 0.6  |
| YME1L1   | ENSG00000136758.18 | 0.6  |
| CSNK1G1  | ENSG00000169118.15 | 0.6  |
| 7-Mar    | ENSG00000136536.14 | 0.6  |
| SIN3A    | ENSG00000169375.15 | 0.6  |
| KDM5B    | ENSG00000117139.16 | 0.6  |
| CDC42SE1 | ENSG00000197622.12 | 0.6  |
| CAPRIN1  | ENSG00000135387.19 | 0.6  |
| INTS7    | ENSG00000143493.12 | 0.59 |
| SMEK2    | ENSG00000275052.4  | 0.59 |
| FBXW2    | ENSG00000119402.16 | 0.59 |
| PGGT1B   | ENSG00000164219.9  | 0.59 |

---

**Supplementary Table 2. Correlation analysis between ADAR expression and immune cell clustering.**

| <b>ID</b> | <b>Main specificity</b>       | <b>Main function</b>       | <b>#Genes</b>       | <b>Annotation reliability</b> |
|-----------|-------------------------------|----------------------------|---------------------|-------------------------------|
| 1         | T-cells                       | Immune response            | <a href="#">378</a> | High                          |
| 2         | T-cells                       | T-cell receptor            | <a href="#">243</a> | Medium                        |
| 3         | Suprabasal keratinocytes      | Cornification              | <a href="#">185</a> | High                          |
| 4         | Platelets                     | Platelet activation        | <a href="#">157</a> | High                          |
| 5         | Bronchus                      | Unknown function           | <a href="#">208</a> | Low                           |
| 6         | Late spermatids               | Spermatogenesis            | <a href="#">433</a> | Medium                        |
| 7         | NK-cells                      | Immune response regulation | <a href="#">312</a> | Medium                        |
| 8         | Oligodendrocytes              | Myelin sheath organization | <a href="#">301</a> | Medium                        |
| 9         | Neurons                       | Nervous system development | <a href="#">235</a> | Medium                        |
| 10        | Neurons and Oligodendrocytes  | Nervous system development | <a href="#">262</a> | High                          |
| 11        | Non-specific                  | Transcription              | <a href="#">188</a> | Medium                        |
| 12        | Non-specific                  | Chromatin organization     | <a href="#">249</a> | Low                           |
| 13        | Hepatocytes                   | Oxidoreductase activity    | <a href="#">177</a> | High                          |
| 14        | Endometrium                   | Transcription regulation   | <a href="#">304</a> | Low                           |
| 15        | Smooth muscle cells           | Muscle contraction         | <a href="#">246</a> | High                          |
| 16        | Non-specific                  | RNA binding                | <a href="#">751</a> | Low                           |
| 17        | Granulosa cells               | Transcription regulation   | <a href="#">353</a> | Medium                        |
| 18        | Non-specific                  | Mixed function             | <a href="#">294</a> | Low                           |
| 19        | Macrophages                   | Innate immune response     | <a href="#">247</a> | High                          |
| 20        | Airway and Pancreas           | Proteolysis                | <a href="#">48</a>  | Medium                        |
| 21        | Serous glandular cells        | Salivary secretion         | <a href="#">134</a> | Medium                        |
| 22        | Squamous epithelial cells     | Keratinization             | <a href="#">298</a> | High                          |
| 23        | Langerhans cells              | Immune response            | <a href="#">91</a>  | Medium                        |
| 24        | Spermatids                    | Unknown function           | <a href="#">117</a> | Low                           |
| 25        | Schwann cells and Melanocytes | Mixed function             | <a href="#">80</a>  | Low                           |
| 26        | Intestinal epithelial cells   | Absorption                 | <a href="#">271</a> | High                          |
| 27        | Skeletal myocytes             | Muscle contraction         | <a href="#">105</a> | High                          |
| 28        | Cytotrophoblasts              | Unknown function           | <a href="#">227</a> | Low                           |
| 29        | Hepatocytes                   | Metabolism                 | <a href="#">152</a> | Medium                        |
| 30        | Breast                        | Lactation                  | <a href="#">82</a>  | High                          |
| 31        | Spermatocytes                 | Spermatogenesis            | <a href="#">213</a> | High                          |
| 32        | Neurons                       | Synaptic function          | <a href="#">237</a> | High                          |
| 33        | Macrophages                   | Degranulation              | <a href="#">283</a> | High                          |
| 34        | Plasma cells                  | Humoral immune response    | <a href="#">86</a>  | High                          |
| 35        | Bipolar cells                 | Visual perception          | <a href="#">159</a> | High                          |
| 36        | Spermatids                    | Spermatogenesis            | <a href="#">419</a> | High                          |
| 37        | Neurons                       | Neuronal signaling         | <a href="#">496</a> | High                          |
| 38        | Neurons                       | Neuronal signaling         | <a href="#">626</a> | High                          |
| 39        | Non-specific                  | Translation                | <a href="#">186</a> | Medium                        |
| 40        | Plasma cells                  | Humoral immune response    | <a href="#">409</a> | Medium                        |
| 41        | Alveolar cells                | Lung function              | <a href="#">118</a> | Medium                        |
| 42        | Spermatocytes and Spermatids  | Spermatogenesis            | <a href="#">353</a> | Medium                        |

|    |                                 |                                  |                     |        |
|----|---------------------------------|----------------------------------|---------------------|--------|
| 43 | Non-specific                    | Cell proliferation               | <a href="#">263</a> | Medium |
| 44 | Photoreceptor cells             | Visual perception                | <a href="#">359</a> | High   |
| 45 | Plasma cells                    | Humoral immune response          | <a href="#">78</a>  | High   |
| 46 | Granulocytes                    | Mast cell degranulation          | <a href="#">60</a>  | Medium |
| 47 | Spermatogonia                   | Spermatogenesis                  | <a href="#">119</a> | Medium |
| 48 | Plasmacytoid dendritic cells    | Unknown function                 | <a href="#">134</a> | Low    |
| 49 | Early spermatids                | Spermatogenesis                  | <a href="#">272</a> | High   |
| 50 | Enterocytes                     | Absorption                       | <a href="#">308</a> | Medium |
| 51 | Late spermatids                 | Spermatogenesis                  | <a href="#">389</a> | High   |
| 52 | Endometrial stromal cells       | ECM organization                 | <a href="#">116</a> | Medium |
| 53 | Connective tissue cells         | ECM organization                 | <a href="#">187</a> | Medium |
| 54 | Extravillous trophoblasts       | Unknown function                 | <a href="#">188</a> | Medium |
| 55 | Endocrine cells                 | Hormone signaling                | <a href="#">81</a>  | High   |
| 56 | Ciliated cells                  | Cilium assembly                  | <a href="#">425</a> | High   |
| 57 | Early spermatids                | Flagellum and Golgi organization | <a href="#">325</a> | Medium |
| 58 | Gastric mucus-secreting cells   | Digestion                        | <a href="#">45</a>  | High   |
| 59 | Proximal enterocytes            | Transmembrane transport          | <a href="#">209</a> | High   |
| 60 | Proximal tubular cells          | Absorption                       | <a href="#">361</a> | High   |
| 61 | Non-specific                    | Transcription                    | <a href="#">366</a> | Low    |
| 62 | B-cells                         | B-cell activation                | <a href="#">166</a> | High   |
| 63 | Astrocytes                      | Nervous system maintenance       | <a href="#">208</a> | High   |
| 64 | Non-specific                    | Transcription                    | <a href="#">655</a> | Medium |
| 65 | Fibroblasts                     | ECM organization                 | <a href="#">292</a> | High   |
| 66 | Endothelial cells               | Angiogenesis                     | <a href="#">468</a> | Medium |
| 67 | Syncytiotrophoblasts            | Pregnancy                        | <a href="#">153</a> | Medium |
| 68 | Muller glia cells               | Visual perception                | <a href="#">142</a> | High   |
| 69 | Macrophages                     | Innate immune response           | <a href="#">217</a> | High   |
| 70 | Basal prostatic cells           | Lipid metabolism                 | <a href="#">167</a> | Medium |
| 71 | Erythroid cells                 | Oxygen transport                 | <a href="#">140</a> | High   |
| 72 | Smooth muscle cells             | ECM organization                 | <a href="#">208</a> | High   |
| 73 | Prostatic glandular cells       | Transcription                    | <a href="#">109</a> | High   |
| 74 | Pancreatic cells                | Mixed function                   | <a href="#">331</a> | Low    |
| 75 | Myeloid cells                   | Innate immune response           | <a href="#">390</a> | Medium |
| 76 | Spermatocytes and Spermatogonia | Spermatogenesis                  | <a href="#">164</a> | High   |
| 77 | Cardiomyocytes                  | Muscle contraction               | <a href="#">404</a> | High   |
